# Supplementary material
Source: PubMed Central journal article supplement (PMC3234859)

Improving efficiency of anticancer drugs by irreversible block of aldehyde dehydrogenases

May Khanna, Che-Hong Chen, Ann Kimble-Hill, Bibek Parajuli, Samantha Perez-Miller,  
Sulochanadevi Baskaran, Jeewon Kim, Karl Dria, Vasilis Vasiliou, Daria Mochly-Rosen and  
Thomas D. Hurley

Figure S1: Chemical modification of human ALDH2 and ALDH3 by aldi inhibitors. (A) Deconvoluted spectrum of ALDH2. (B) Deconvoluted spectrum of ALDH2 incubated with a 2-fold excess of Aldi-1. (C) Deconvoluted spectrum of ALDH2 incubated with a 2-fold excess of Aldi-2. (D) Deconvoluted spectrum of ALDH2 incubated with a 2-fold excess of Aldi-3. Deconvoluted spectrum of ALDH3. (F) Deconvoluted spectrum of ALDH3 incubated with a 2-fold excess of aldi-3. (G) Deconvoluted spectrum of ALDH3-E209Q mutant in the presence of aldi-3 (red font is used to highlight residues that were not shifted following modifications with aldi inhibitors, blue font highlights shifted residues).

Supplemental Figure 1

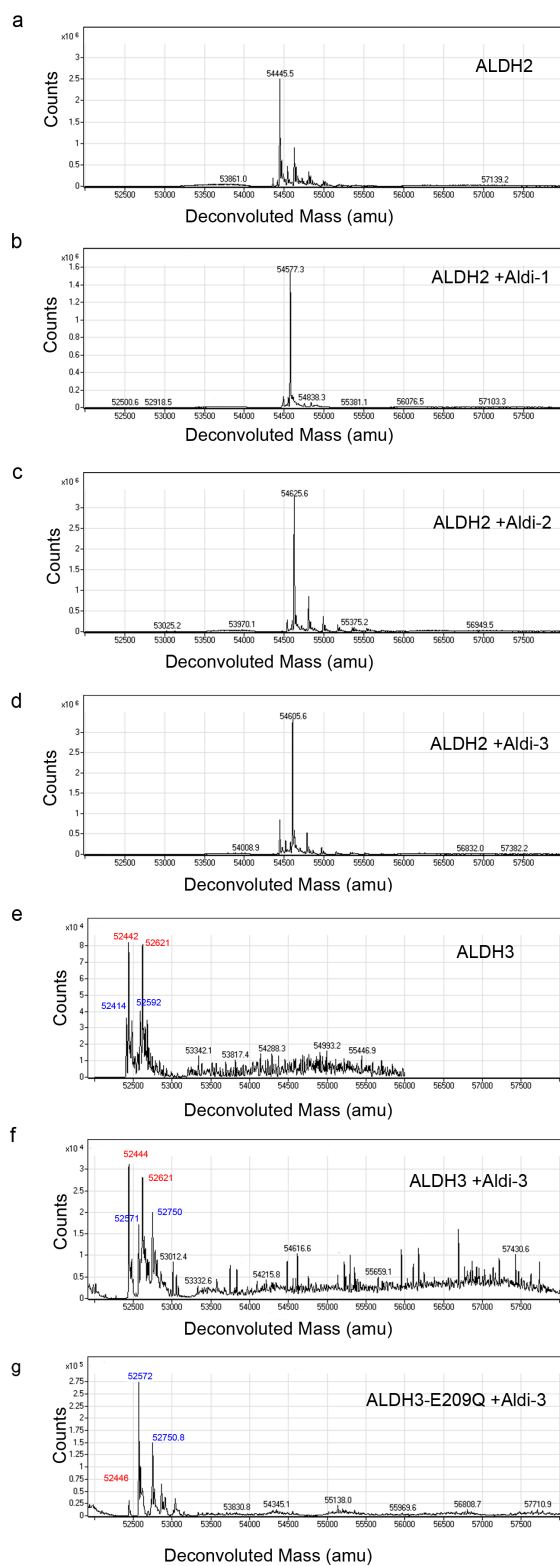

Supplement: supp_M111.293597_jbc.M111.293597-1.pdf [file supp_M111.293597_jbc.M111.293597-1.pdf]
